# Supplementary material for: Lignin-Containing Cellulose Nanofibrils from TEMPO-Mediated Oxidation of Date Palm Waste: Preparation, Characterization, and Reinforcing Potential
Source: MDPI journal article supplement (doi:10.3390/nano13010126), 2022-12-26
Supplement: s1 [file s1]

# Lignin-Containing Cellulose Nanofibrils from TEMPO-mediated Oxidation of Date Palm Waste: Preparation, Characterization, and Reinforcing Potential

Amira Najahi <sup>1</sup>, Quim Tarrés <sup>2</sup>, Pere Mutjé <sup>2</sup>, Marc Delgado-Aguilar <sup>2,\*</sup>, Jean-Luc Putaux <sup>3</sup> and Sami Boufi <sup>1,\*</sup>

<sup>1</sup> University of Sfax, LMSE, Faculty of Science, BP 802 – 3018 Sfax, Tunisia

<sup>2</sup> LEPAMAP-PRODIS Research Group, University of Girona. C/ Maria Aurèlia Capmany, 61 – 17003 Girona, Spain

<sup>3</sup> Université Grenoble Alpes, CNRS, CERMAV, F-38000 Grenoble, France

\* Correspondence: m.delgado@udg.edu (M.D.-A.); sami.boufi@fss.rnu.tn (S.B.)

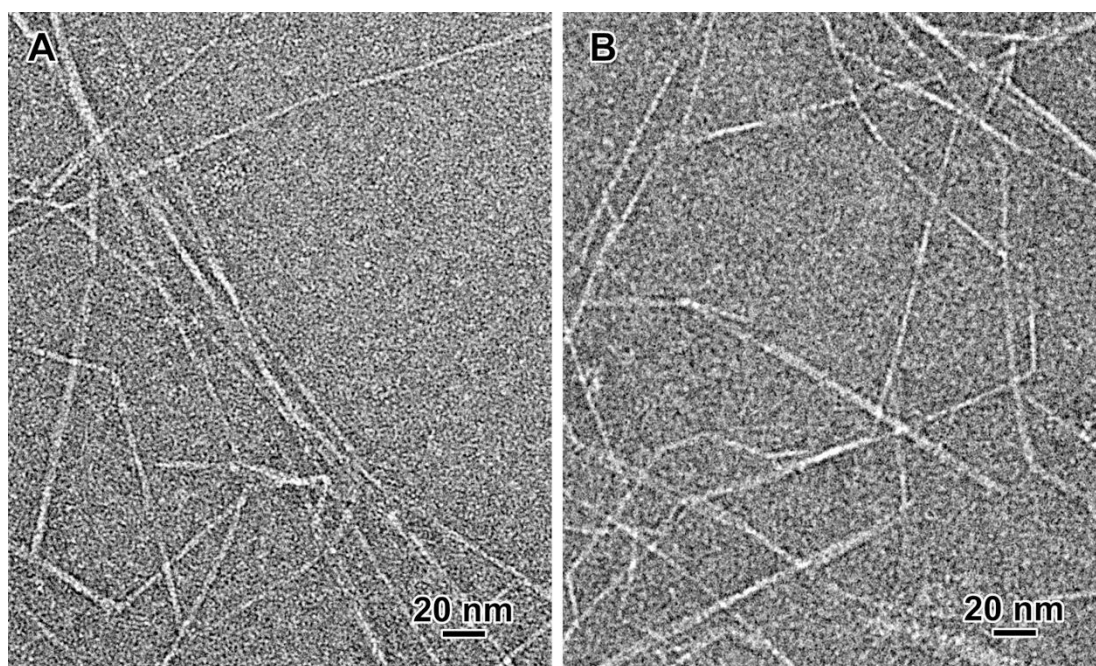

**Figure S1.** High-magnification TEM images of negatively stained preparations from LCNF-800 (A) and LCNF-1200 (B) showing bundled and individual cellulose nanofibrils.
